# Supplementary material
Source: PubMed Central journal article supplement (PMC5945079)
Supplement: JSLHR-60-3198-s001.pdf [file JSLHR-60-3198-s001.pdf]

**Supplemental Material S1.** Nonword repetition stimuli from Experiment 1.

| <b>Syllable length</b> | <b>E7<sup>a</sup> stimuli</b> | <b>L7<sup>a</sup> stimuli</b> |
|------------------------|-------------------------------|-------------------------------|
| One-syllable           | /faiɹ/                        | /zaiθ/                        |
|                        | /vom/                         | /θeɟ/                         |
|                        | /taud/                        | /lɔɪs/                        |
|                        | /dɔɪf/                        | /rauð/                        |
| Two-syllable           | /tævam/                       | /sæθɑɟ/                       |
|                        | /maʊnɑv/                      | /ʃauzeð/                      |
|                        | /vefum/                       | /θulaʊɟ/                      |
|                        | /nɔɪtef/                      | /ðɔɪzɑl/                      |
| Three-syllable         | /dævepɔɪn/                    | /θɑɟɔɪzɔs/                    |
|                        | /mɔɪpæfaʊn/                   | /sɑlæður/                     |
|                        | /vutaʊmæf/                    | /θuræðɔɪɟ/                    |
|                        | /faɪdɑvɔp/                    | /ʃæθɔɪraʊs/                   |
| Four-syllable          | /dɑvʊpɔɪtæf/                  | /ðusæzelɔɪθ/                  |
|                        | /nɔɪfaʊmævat/                 | /rælaʊɟɔɪzɑs/                 |
|                        | /tedæfumɔɪn/                  | /zaiθɔɪɟæsɑr/                 |
|                        | /maʊdɔɪnɑpæv/                 | /ʃauθezɔlæð/                  |

<sup>a</sup>The stimuli for this study comprised either early- (E) or late- (L) developing consonant phonemes, with seven phonemes per group: E7 and L7.
