# Supplementary material
Source: PubMed Central journal article supplement (PMC5945079)
Supplement: JSLHR-60-3198-s002.pdf [file JSLHR-60-3198-s002.pdf]

**Supplemental Material S2.** Nonword repetition summary statistics of the stimuli characteristics using independent sample *t* tests.

| <b>Syllable length</b>              | <b>Sum of phonotactic Probability</b> | <b>Sum of biphone probability</b>                     | <b>Spoken duration in ms</b>                          |
|-------------------------------------|---------------------------------------|-------------------------------------------------------|-------------------------------------------------------|
| <b>1-syllable</b>                   |                                       |                                                       |                                                       |
| <i>M<sub>E7</sub></i> ( <i>SD</i> ) | .102 (.022)                           | .0018 (.0016)                                         | 709.50 (16.86)                                        |
| <i>M<sub>L7</sub></i> ( <i>SD</i> ) | .067 (.034)                           | .0006 (.0003)                                         | 760.75 (45.68)                                        |
|                                     | <i>t</i> (6) = 1.71<br><i>p</i> = .14 | <i>t</i> (3.15) <sup>a</sup> = 1.58<br><i>p</i> = .21 | <i>t</i> (3.8) <sup>a</sup> = -2.11<br><i>p</i> = .11 |
| <b>2-syllable</b>                   |                                       |                                                       |                                                       |
| <i>M<sub>E7</sub></i> ( <i>SD</i> ) | .154 (.044)                           | .0045 (.0031)                                         | 1158.75 (57.36)                                       |
| <i>M<sub>L7</sub></i> ( <i>SD</i> ) | .121 (.072)                           | .0032 (.0025)                                         | 1082.25 (30.40)                                       |
|                                     | <i>t</i> (6) = 0.78<br><i>p</i> = .46 | <i>t</i> (6) = 0.69<br><i>p</i> = .51                 | <i>t</i> (6) = 2.36<br><i>p</i> = .06                 |
| <b>3-syllable</b>                   |                                       |                                                       |                                                       |
| <i>M<sub>E7</sub></i> ( <i>SD</i> ) | .210 (.050)                           | .0043 (.0015)                                         | 1405.00 (105.15)                                      |
| <i>M<sub>L7</sub></i> ( <i>SD</i> ) | .209 (.070)                           | .0040 (.0040)                                         | 1376.75 (92.38)                                       |
|                                     | <i>t</i> (6) = 0.02<br><i>p</i> = .98 | <i>t</i> (6) = 0.15<br><i>p</i> = .89                 | <i>t</i> (6) = 0.40<br><i>p</i> = .70                 |
| <b>4-syllable</b>                   |                                       |                                                       |                                                       |
| <i>M<sub>E7</sub></i> ( <i>SD</i> ) | .261 (.040)                           | .0036 (.0015)                                         | 1730.25 (74.87)                                       |
| <i>M<sub>L7</sub></i> ( <i>SD</i> ) | .196 (.081)                           | .0057 (.0055)                                         | 1743.50 (79.04)                                       |
|                                     | <i>t</i> (6) = 1.44<br><i>p</i> = .20 | <i>t</i> (6) = -0.73<br><i>p</i> = .49                | <i>t</i> (6) = -0.24<br><i>p</i> = .82                |

<sup>a</sup>Equal variances not assumed using Levene's Test.
