# Supplementary material
Source: PubMed Central journal article supplement (PMC5945079)
Supplement: JSLHR-60-3198-s004.pdf [file JSLHR-60-3198-s004.pdf]

**Supplemental Material S4.** Nonword reading summary statistics of the stimuli characteristics using independent sample *t* tests.

**Orthographic characteristics**

| <b>Phoneme type</b>           | <b>Number of letters</b>         | <b>Orthographic neighborhood</b> | <b>Mean bigram frequency</b> |
|-------------------------------|----------------------------------|----------------------------------|------------------------------|
| E7 <sup>a</sup> <i>M (SD)</i> | 4.050 (0.510)                    | 7.100 (4.876)                    | 2426.40 (1296.48)            |
| L7 <sup>a</sup> <i>M (SD)</i> | 4.500 (0.889)                    | 5.050 (5.125)                    | 2971.04 (1240.65)            |
|                               | $t(30.3)^b = -1.96$<br>$p = .06$ | $t(38) = 1.30$<br>$p = .20$      | $t(38) = -1.36$<br>$p = .18$ |

**Phonological characteristics**

| <b>Phoneme type</b>           | <b>Phonological neighborhood</b> | <b>Sum of phonotactic probability</b> | <b>Sum of bigram probability</b> |
|-------------------------------|----------------------------------|---------------------------------------|----------------------------------|
| E7 <sup>a</sup> <i>M (SD)</i> | 16.70 (5.89)                     | .1227 (.0327)                         | .0038 (.0028)                    |
| L7 <sup>a</sup> <i>M (SD)</i> | 16.15 (11.31)                    | .1149 (.0451)                         | .0051 (.0063)                    |
|                               | $t(28.6)^b = 0.19$<br>$p = .85$  | $t(38) = 0.63$<br>$p = .53$           | $t(26.3)^b = -0.90$<br>$p = .38$ |

**Constituent CV and VC characteristics**

| <b>Phoneme type</b>           | <b>Wordlikeness of CVs</b>  | <b># of friends of VCs</b>  | <b>Consistency ratio of VCs</b> |
|-------------------------------|-----------------------------|-----------------------------|---------------------------------|
| E7 <sup>a</sup> <i>M (SD)</i> | 3.54 (1.47)                 | 6.60 (5.60)                 | .99 (.06)                       |
| L7 <sup>a</sup> <i>M (SD)</i> | 2.76 (1.60)                 | 6.35 (6.10)                 | .96 (.08)                       |
|                               | $t(38) = 1.61$<br>$p = .12$ | $t(38) = 0.14$<br>$p = .89$ | $t(31) = 1.05$<br>$p = .30$     |

*Note.* CV = consonant–vowel; VC = vowel–consonant.

<sup>a</sup>The stimuli for this study comprised either early- (E) or late- (L) developing consonant phonemes, with seven phonemes per group: E7 and L7. <sup>b</sup>Equal variances not assumed using Levene's Test.
