# Supplementary material
Source: PubMed Central journal article supplement (PMC5945079)
Supplement: JSLHR-60-3198-s006.pdf [file JSLHR-60-3198-s006.pdf]

**Supplemental Material S6.** Auditory lexical decision (Experiment 1) summary statistics of the stimuli characteristics using independent sample *t* tests.

| <b>Stimuli type</b>           | <b>Phonological neighborhood</b>        | <b>Sum of phonotactic probability</b>  | <b>Sum of biphone probability</b>                     | <b>Spoken duration in ms</b>            | <b>Word frequency</b>                  | <b>Word frequency of constituent CV</b> |
|-------------------------------|-----------------------------------------|----------------------------------------|-------------------------------------------------------|-----------------------------------------|----------------------------------------|-----------------------------------------|
| <b>Nonwords</b>               |                                         |                                        |                                                       |                                         |                                        |                                         |
| E7 <sup>a</sup> <i>M (SD)</i> | 17.73 (10.68)                           | .128 (.045)                            | .004 (.003)                                           | 709.40 (1.47)                           | N/A                                    | 8.90 (1.99)                             |
| L7 <sup>a</sup> <i>M (SD)</i> | 17.20 (8.57)                            | .102 (.039)                            | .003 (.002)                                           | 738.27 (50.03)                          |                                        | 9.56 (2.29)                             |
|                               | <i>t</i> (28) = 0.15<br><i>p</i> = .88  | <i>t</i> (28) = 1.69<br><i>p</i> = .10 | <i>t</i> (23.7) <sup>b</sup> = 1.71<br><i>p</i> = .10 | <i>t</i> (28) = -1.25<br><i>p</i> = .22 |                                        | <i>t</i> (28) = -.72<br><i>p</i> = .48  |
| <b>Words</b>                  |                                         |                                        |                                                       |                                         |                                        |                                         |
| E7 <sup>a</sup> <i>M (SD)</i> | 26.73 (12.14)                           | .147 (.048)                            | .007 (.005)                                           | 709.87 (88.89)                          | 8.68 (2.17)                            | 9.06 (2.33)                             |
| L7 <sup>a</sup> <i>M (SD)</i> | 30.50 (15.86)                           | .127 (.063)                            | .007 (.007)                                           | 739.25 (69.97)                          | 8.31 (2.61)                            | 10.13 (2.03)                            |
|                               | <i>t</i> (25) = -0.70<br><i>p</i> = .49 | <i>t</i> (25) = 0.97<br><i>p</i> = .34 | <i>t</i> (25) = 0.01<br><i>p</i> = 1.0                | <i>t</i> (28) = -0.94<br><i>p</i> = .36 | <i>t</i> (25) = 0.40<br><i>p</i> = .69 | <i>t</i> (18) = -1.09<br><i>p</i> = .29 |

*Note.* Word frequency was measured using log frequency from the HAL database, retrieved from the English Lexicon Project website (Balota et al., 2007).

<sup>a</sup>The stimuli for this study comprised either early- (E) or late- (L) developing consonant phonemes, with seven phonemes per group: E7 and L7.

<sup>b</sup>Equal variances not assumed using Levene’s Test.

**Reference**

Balota, D. A., Yap, M. J., Hutchison, K. A., Cortese, M. J., Kessler, B., Loftis, B., . . . Treiman, R. (2007). The English Lexicon Project. *Behavior Research Methods*, 39, 445–459.
