# Supplementary material
Source: PubMed Central journal article supplement (PMC5945079)
Supplement: JSLHR-60-3198-s007.pdf [file JSLHR-60-3198-s007.pdf]

**Supplemental Material S7.** Word and nonword stimuli for List 1 of the lexical decision task in Experiment 2.

| Stimulus lists    | Nonwords         |                   | Words                |                   |
|-------------------|------------------|-------------------|----------------------|-------------------|
|                   | Spelling         | Pronunciation     | Spelling             | Pronunciation     |
| Early-7 (E7) list | daif             | /def/             | dawn                 | /dɔn/             |
|                   | dutt             | /dʌt/             | deep                 | /di:p/            |
|                   | foat             | /fot/             | fade                 | /fed/             |
|                   | fute             | /fut/             | five                 | /faiv/            |
|                   | meef             | /mif/             | fought               | /fɔt/             |
|                   | mipe             | /maip/            | knife                | /naif/            |
|                   | neave            | /niv/             | mauve                | /mɔv/             |
|                   | nime             | /naim/            | moon                 | /mun/             |
|                   | paim             | /pem/             | note                 | /not/             |
|                   | pote             | /pot/             | pout                 | /paʊt/            |
|                   | teeve            | /tiv/             | putt                 | /pʌt/             |
|                   | toff             | /tɔf/             | teed                 | /tid/             |
|                   | vapp             | /væp/             | town                 | /taʊn/            |
|                   | vife             | /vaif/            | vied                 | /vaid/            |
|                   | vean             | /vin/             | van                  | /væn/             |
|                   | Late-7 (L7) list | laz               | /læz/                | laws              |
| saith             |                  | /seθ/             | laze                 | /lez/             |
| lesh              |                  | /leʃ/             | loathe               | /loð/             |
| rel               |                  | /rɛl/             | race                 | /res/             |
| reez              |                  | /riz/             | rise                 | /raiz/            |
| shuss             |                  | /ʃʌs/             | rush                 | /rʌʃ/             |
| shule             |                  | /ʃul/             | sash                 | /sæʃ/             |
| sosh              |                  | /sɔʃ/             | sear                 | /sir/             |
| sithe             |                  | /saɪð/            | sell                 | /sel/             |
| thace             |                  | /ðes/             | shawl                | /ʃɔl/             |
| thauz             |                  | /θaʊz/            | shoes                | /ʃuz/             |
| thole             |                  | /ðol/             | this                 | /ðɪs/             |
| thoss             |                  | /θɔs/             | thin <sup>a</sup>    | /θɪn <sup>a</sup> |
| zal               |                  | /zæl/             | thought <sup>a</sup> | /θɔt <sup>a</sup> |
| zole              | /zol/            | zoom <sup>a</sup> | /zum <sup>a</sup>    |                   |

<sup>a</sup>Indicates “mixed” words that contain an L7 phoneme in the initial position of the word and an E7 phoneme in the final position of the word. These words were used due to the limited possibilities of real consonant–vowel–consonant (CVC) words that consist of only L7 phonemes and that meet all of the other criteria. These “mixed” words were not included in analyses with E7 and L7 comparisons.
