# Supplementary material
Source: PubMed Central journal article supplement (PMC5945079)
Supplement: JSLHR-60-3198-s011.pdf [file JSLHR-60-3198-s011.pdf]

**Supplemental Material S11.** Summary statistics of the Experiment 2 nonword stimuli characteristics using  $2 \times 4$  (Phoneme Type  $\times$  List) analyses of variance (ANOVAs).

| <b><u>Orthographic characteristics</u></b> |                                 |                                  |                                 |                                 |                                 |
|--------------------------------------------|---------------------------------|----------------------------------|---------------------------------|---------------------------------|---------------------------------|
| <b>Stimulus lists</b>                      | <b>Number of letters</b>        | <b>Orthographic neighborhood</b> | <b>Mean bigram frequency</b>    | <b>Number of friends</b>        | <b>Consistency ratio</b>        |
| <b>E7<sup>a</sup> nonwords</b>             |                                 |                                  |                                 |                                 |                                 |
| <i>M</i> <sub>1</sub> ( <i>SD</i> )        | 4.13 (0.35)                     | 7.67 (4.29)                      | 2549.31 (1179.39)               | 7.13 (4.09)                     | 1.00 (.00)                      |
| <i>M</i> <sub>2</sub> ( <i>SD</i> )        | 4.00 (0.53)                     | 9.73 (4.57)                      | 2564.44 (921.67)                | 10.93 (5.70)                    | .95 (.09)                       |
| <i>M</i> <sub>3</sub> ( <i>SD</i> )        | 4.13 (0.64)                     | 8.20 (4.49)                      | 2681.55 (1380.20)               | 8.07 (5.68)                     | 1.00 (.00)                      |
| <i>M</i> <sub>4</sub> ( <i>SD</i> )        | 4.00 (0.38)                     | 8.27 (4.70)                      | 2688.41 (1115.63)               | 8.47 (5.45)                     | .99 (.06)                       |
| <b>L7<sup>a</sup> nonwords</b>             |                                 |                                  |                                 |                                 |                                 |
| <i>M</i> <sub>1</sub> ( <i>SD</i> )        | 4.33 (0.82)                     | 5.93 (4.95)                      | 3273.63 (1499.09)               | 6.47 (5.42)                     | .98 (.06)                       |
| <i>M</i> <sub>2</sub> ( <i>SD</i> )        | 4.27 (0.59)                     | 6.93 (5.01)                      | 2683.81 (1200.94)               | 7.67 (6.04)                     | .94 (.11)                       |
| <i>M</i> <sub>3</sub> ( <i>SD</i> )        | 4.27 (0.70)                     | 7.80 (6.67)                      | 2946.24 (1281.55)               | 9.40 (6.88)                     | .98 (.06)                       |
| <i>M</i> <sub>4</sub> ( <i>SD</i> )        | 4.27 (0.80)                     | 6.20 (5.62)                      | 2875.92 (1322.19)               | 6.60 (5.67)                     | .95 (.11)                       |
| Main effect <sub>Type</sub>                | $F(1, 112) = 3.62$<br>$p = .06$ | $F(1, 112) = 3.55$<br>$p = .06$  | $F(1, 112) = 2.02$<br>$p = .16$ | $F(1, 112) = 1.17$<br>$p = .28$ | $F(1, 106) = 3.06$<br>$p = .08$ |
| Main effect <sub>List</sub>                | $F(3, 112) = 0.19$<br>$p = .90$ | $F(3, 112) = 0.57$<br>$p = .64$  | $F(3, 112) = 0.27$<br>$p = .84$ | $F(3, 112) = 1.20$<br>$p = .31$ | $F(3, 106) = 2.32$<br>$p = .08$ |
| Type $\times$ List                         | $F(3, 112) = 0.08$<br>$p = .97$ | $F(3, 112) = 0.29$<br>$p = .83$  | $F(3, 112) = 0.36$<br>$p = .78$ | $F(3, 112) = 0.89$<br>$p = .45$ | $F(3, 106) = 0.05$<br>$p = .98$ |

<sup>a</sup>The stimuli for this study comprised either early- (E) or late- (L) developing consonant phonemes, with seven phonemes per group: E7 and L7.

**Supplemental Material S11.** (continued)

| Stimulus lists                      | <u>Phonological characteristics</u> |                                 |                                 |                                 |
|-------------------------------------|-------------------------------------|---------------------------------|---------------------------------|---------------------------------|
|                                     | Phonological neighborhood           | Sum of phonotactic probability  | Sum of biphone probability      | Spoken duration in ms           |
| <b>E7<sup>a</sup> nonwords</b>      |                                     |                                 |                                 |                                 |
| <i>M</i> <sub>1</sub> ( <i>SD</i> ) | 19.47 (7.34)                        | .126 (.036)                     | .004 (.003)                     | 739.53 (53.12)                  |
| <i>M</i> <sub>2</sub> ( <i>SD</i> ) | 22.67 (9.90)                        | .125 (.029)                     | .004 (.002)                     | 732.87 (56.26)                  |
| <i>M</i> <sub>3</sub> ( <i>SD</i> ) | 19.93 (7.40)                        | .123 (.034)                     | .004 (.003)                     | 748.27 (48.03)                  |
| <i>M</i> <sub>4</sub> ( <i>SD</i> ) | 23.00 (9.30)                        | .136 (.033)                     | .004 (.002)                     | 744.80 (56.20)                  |
| <b>L7<sup>a</sup> nonwords</b>      |                                     |                                 |                                 |                                 |
| <i>M</i> <sub>1</sub> ( <i>SD</i> ) | 20.33 (13.38)                       | .123 (.034)                     | .005 (.004)                     | 758.40 (51.87)                  |
| <i>M</i> <sub>2</sub> ( <i>SD</i> ) | 21.00 (12.35)                       | .127 (.033)                     | .005 (.004)                     | 738.73 (32.89)                  |
| <i>M</i> <sub>3</sub> ( <i>SD</i> ) | 19.27 (11.03)                       | .127 (.046)                     | .005 (.006)                     | 762.73 (34.10)                  |
| <i>M</i> <sub>4</sub> ( <i>SD</i> ) | 21.73 (11.28)                       | .124 (.066)                     | .006 (.007)                     | 765.13 (26.46)                  |
| Main effect <sub>Type</sub>         | $F(1, 112) = 0.13$<br>$p = .72$     | $F(1, 112) = 0.09$<br>$p = .76$ | $F(1, 112) = 1.51$<br>$p = .22$ | $F(1, 112) = 3.11$<br>$p = .08$ |
| Main effect <sub>List</sub>         | $F(3, 112) = 0.52$<br>$p = .67$     | $F(3, 112) = 0.11$<br>$p = .95$ | $F(3, 112) = 0.29$<br>$p = .84$ | $F(3, 112) = 1.18$<br>$p = .32$ |
| Type × List                         | $F(3, 112) = 0.09$<br>$p = .97$     | $F(3, 112) = 0.25$<br>$p = .87$ | $F(3, 112) = 0.18$<br>$p = .91$ | $F(3, 112) = 0.15$<br>$p = .93$ |

<sup>a</sup>The stimuli for this study comprised either early- (E) or late- (L) developing consonant phonemes, with seven phonemes per group: E7 and L7.
