# Supplementary material
Source: PubMed Central journal article supplement (PMC5945079)
Supplement: JSLHR-60-3198-s012.pdf [file JSLHR-60-3198-s012.pdf]

**Supplemental Material S12.** Summary statistics of the Experiment 2 word stimuli characteristics using 2 × 4 (Phoneme Type × List) analyses of variance (ANOVAs).

| <u>Orthographic characteristics</u> |                                 |                                 |                                 |                                  |                                 |                            |
|-------------------------------------|---------------------------------|---------------------------------|---------------------------------|----------------------------------|---------------------------------|----------------------------|
| Stimulus lists                      | Number of letters               | Orthographic neighborhood       | Mean bigram frequency           | Number of friends                | Consistency ratio               | Word frequency             |
| <b>E7<sup>a</sup> words</b>         |                                 |                                 |                                 |                                  |                                 |                            |
| <i>M</i> <sub>1</sub> ( <i>SD</i> ) | 4.20 (0.68)                     | 9.33 (5.27)                     | 2750.89 (1522.69)               | 12.07 (6.05)                     | .94 (.13)                       | 8.43 (2.57)                |
| <i>M</i> <sub>2</sub> ( <i>SD</i> ) | 4.07 (0.46)                     | 11.07 (6.66)                    | 3217.27 (2087.79)               | 13.67 (8.58)                     | .95 (.21)                       | 9.49 (1.75)                |
| <i>M</i> <sub>3</sub> ( <i>SD</i> ) | 4.20 (0.68)                     | 9.80 (5.20)                     | 3490.26 (2015.56)               | 13.40 (9.00)                     | .87 (.26)                       | 8.83 (2.19)                |
| <i>M</i> <sub>4</sub> ( <i>SD</i> ) | 4.20 (0.41)                     | 11.60 (5.34)                    | 3884.36 (1787.24)               | 16.00 (8.07)                     | .87 (.23)                       | 9.93 (2.03)                |
| <b>L7<sup>a</sup> words</b>         |                                 |                                 |                                 |                                  |                                 |                            |
| <i>M</i> <sub>1</sub> ( <i>SD</i> ) | 4.33 (0.65)                     | 11.33 (6.92)                    | 3235.04 (1233.19)               | 12.33 (8.43)                     | .78 (.28)                       | 8.65 (3.29)                |
| <i>M</i> <sub>2</sub> ( <i>SD</i> ) | 4.33 (0.49)                     | 10.17 (6.89)                    | 4004.40 (1460.55)               | 9.17 (8.08)                      | .90 (.23)                       | 9.89 (1.92)                |
| <i>M</i> <sub>3</sub> ( <i>SD</i> ) | 4.42 (0.51)                     | 11.17 (5.61)                    | 3639.29 (982.70)                | 15.50 (10.04)                    | .87 (.18)                       | 8.33 (2.42)                |
| <i>M</i> <sub>4</sub> ( <i>SD</i> ) | 4.25 (0.45)                     | 13.83 (6.49)                    | 3592.93 (1410.94)               | 14.67 (10.04)                    | .82 (.34)                       | 8.20 (3.12)                |
| Main effect <sub>Type</sub>         | $F(1, 100) = 2.42$<br>$p = .12$ | $F(1, 100) = 1.01$<br>$p = .32$ | $F(1, 100) = 0.79$<br>$p = .38$ | $F(1, 100) = 0.27$<br>$p = .60$  | $F(1, 100) = 1.83$<br>$p = .18$ | $F(1) = 0.75$<br>$p = .39$ |
| Main effect <sub>List</sub>         | $F(3, 100) = 0.20$<br>$p = .90$ | $F(3, 100) = 0.93$<br>$p = .43$ | $F(3, 100) = 1.09$<br>$p = .36$ | $F(3, 100) = 1.24$<br>$p = 0.30$ | $F(3, 100) = 0.56$<br>$p = .64$ | $F(3) = 1.30$<br>$p = .28$ |
| Type × List                         | $F(3, 100) = 0.20$<br>$p = .90$ | $F(3, 100) = 0.37$<br>$p = .77$ | $F(3, 100) = 0.53$<br>$p = .66$ | $F(3, 100) = 0.72$<br>$p = .55$  | $F(3, 100) = 0.53$<br>$p = .67$ | $F(3) = 1.05$<br>$p = .37$ |

*Note.* Word frequency was measured using log frequency from the HAL database, retrieved from the English Lexicon Project website (Balota et al., 2007).

<sup>a</sup>The stimuli for this study comprised either early- (E) or late- (L) developing consonant phonemes, with seven phonemes per group: E7 and L7.

**Supplemental Material S12. (continued)**

| Stimulus lists                      | <u>Phonological characteristics</u> |                                 |                                 |                                 |
|-------------------------------------|-------------------------------------|---------------------------------|---------------------------------|---------------------------------|
|                                     | Phonological neighborhood           | Sum of phonotactic probability  | Sum of biphone probability      | Spoken duration in ms           |
| <b>E7<sup>a</sup> words</b>         |                                     |                                 |                                 |                                 |
| <i>M</i> <sub>1</sub> ( <i>SD</i> ) | 24.93 (9.02)                        | .135 (.037)                     | .004 (.004)                     | 744.40 (29.03)                  |
| <i>M</i> <sub>2</sub> ( <i>SD</i> ) | 31.07 (10.66)                       | .142 (.036)                     | .005 (.002)                     | 731.13 (26.05)                  |
| <i>M</i> <sub>3</sub> ( <i>SD</i> ) | 26.20 (13.84)                       | .135 (.030)                     | .004 (.003)                     | 754.46 (36.26)                  |
| <i>M</i> <sub>4</sub> ( <i>SD</i> ) | 32.33 (8.98)                        | .150 (.031)                     | .005 (.002)                     | 754.80 (38.88)                  |
| <b>L7<sup>a</sup> words</b>         |                                     |                                 |                                 |                                 |
| <i>M</i> <sub>1</sub> ( <i>SD</i> ) | 29.50 (14.79)                       | .132 (.063)                     | .006 (.006)                     | 762.08 (34.14)                  |
| <i>M</i> <sub>2</sub> ( <i>SD</i> ) | 34.92 (18.47)                       | .135 (.051)                     | .006 (.005)                     | 745.75 (33.58)                  |
| <i>M</i> <sub>3</sub> ( <i>SD</i> ) | 34.08 (17.65)                       | .135 (.051)                     | .006 (.006)                     | 761.83 (30.33)                  |
| <i>M</i> <sub>4</sub> ( <i>SD</i> ) | 30.83 (13.86)                       | .131 (.048)                     | .005 (.005)                     | 740.25 (50.87)                  |
| Main effect <sub>Type</sub>         | $F(1, 100) = 2.00$<br>$p = .16$     | $F(1, 100) = 0.76$<br>$p = .38$ | $F(1, 100) = 1.92$<br>$p = .17$ | $F(1, 100) = 0.84$<br>$p = .36$ |
| Main effect <sub>List</sub>         | $F(3, 100) = 0.89$<br>$p = .45$     | $F(3, 100) = 0.16$<br>$p = .92$ | $F(3, 100) = 0.02$<br>$p = 1.0$ | $F(3, 100) = 1.53$<br>$p = .21$ |
| Type × List                         | $F(3, 100) = 0.55$<br>$p = .65$     | $F(3, 100) = 0.23$<br>$p = .87$ | $F(3, 100) = 0.22$<br>$p = .88$ | $F(3, 100) = 1.13$<br>$p = .34$ |

*Note.* Word frequency was measured using log frequency from the HAL database, retrieved from the English Lexicon Project website (Balota et al., 2007).

<sup>a</sup>The stimuli for this study comprised either early- (E) or late- (L) developing consonant phonemes, with seven phonemes per group: E7 and L7.

**Reference**

Balota, D. A., Yap, M. J., Hutchison, K. A., Cortese, M. J., Kessler, B., Loftis, B., . . . Treiman, R. (2007). The English Lexicon Project. *Behavior Research Methods*, 39, 445–459.
